# Supplementary material for: Varmole: a biologically drop-connect deep neural network model for prioritizing disease risk variants and genes
Source: Oxford University Press journal article supplement (doi:10.1093/bioinformatics/btaa866), 2020-09-23
Supplement: btaa866_supplementary_data.zip [file btaa866_supplementary_data.zip]

Archive with 4 entries (4 files):
- Supplematary Materials.pdf
- Supplementary_Table1.xlsx
- Supplementary_Table2.xlsx
- Supplementary_Table3.xlsx
